# Supplementary material for: Genome Analysis of Endotrypanum and Porcisia spp., Closest Phylogenetic Relatives of Leishmania, Highlights the Role of Amastins in Shaping Pathogenicity
Source: MDPI journal article supplement (doi:10.3390/genes12030444), 2021-03-20
Supplement: s1 [file s1]

# Endotrypanum monterogei ATCC30507

Before decontamination

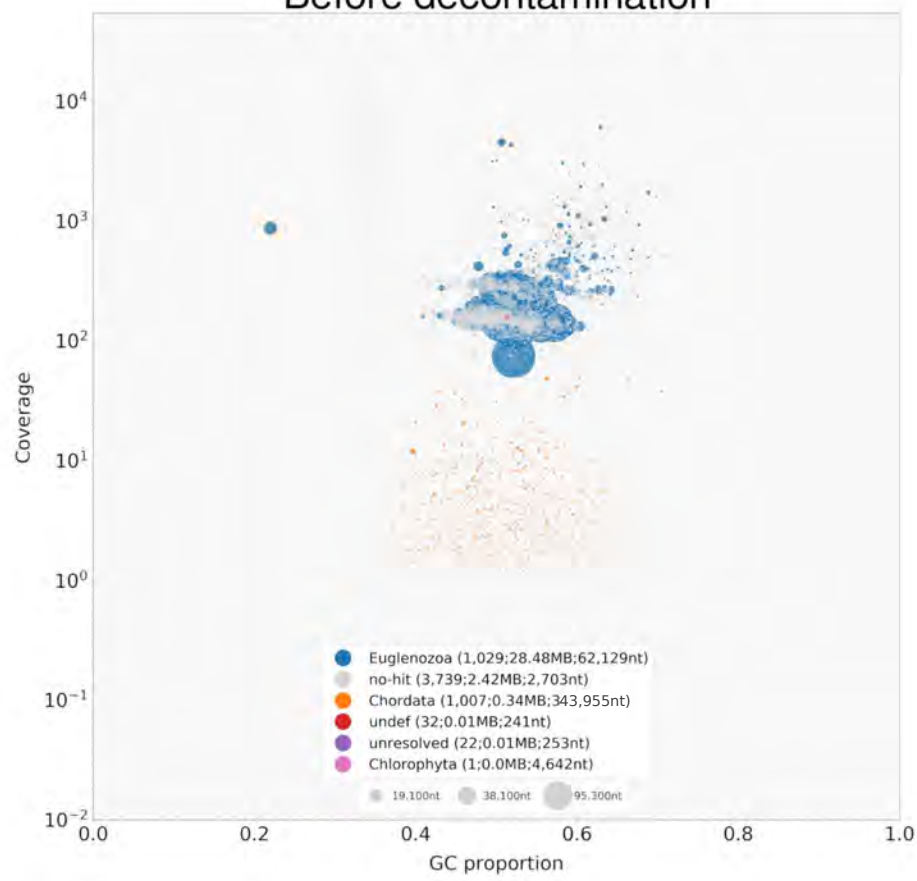

Unmapped: 0.28%; Mapped: 99.72%

After decontamination

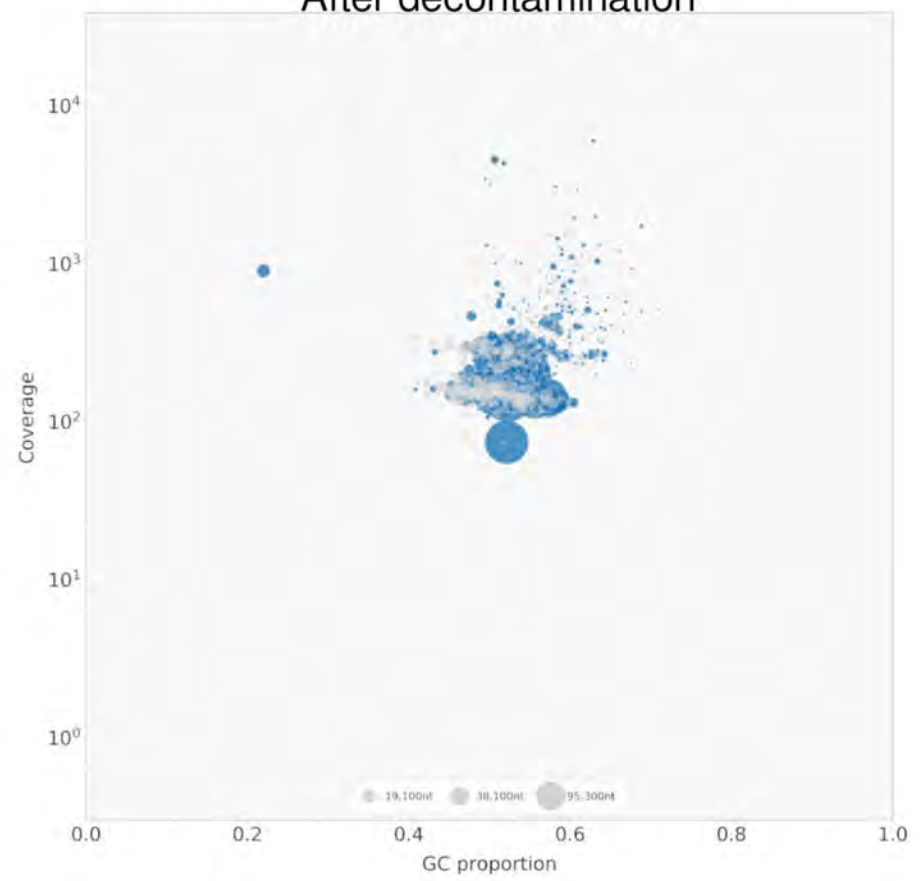

Unmapped: 0%; Mapped: 100% (Euglenozoa: 80.7%, no-hit: 19.3%,

# Porcisia deanei TCC258

Before decontamination

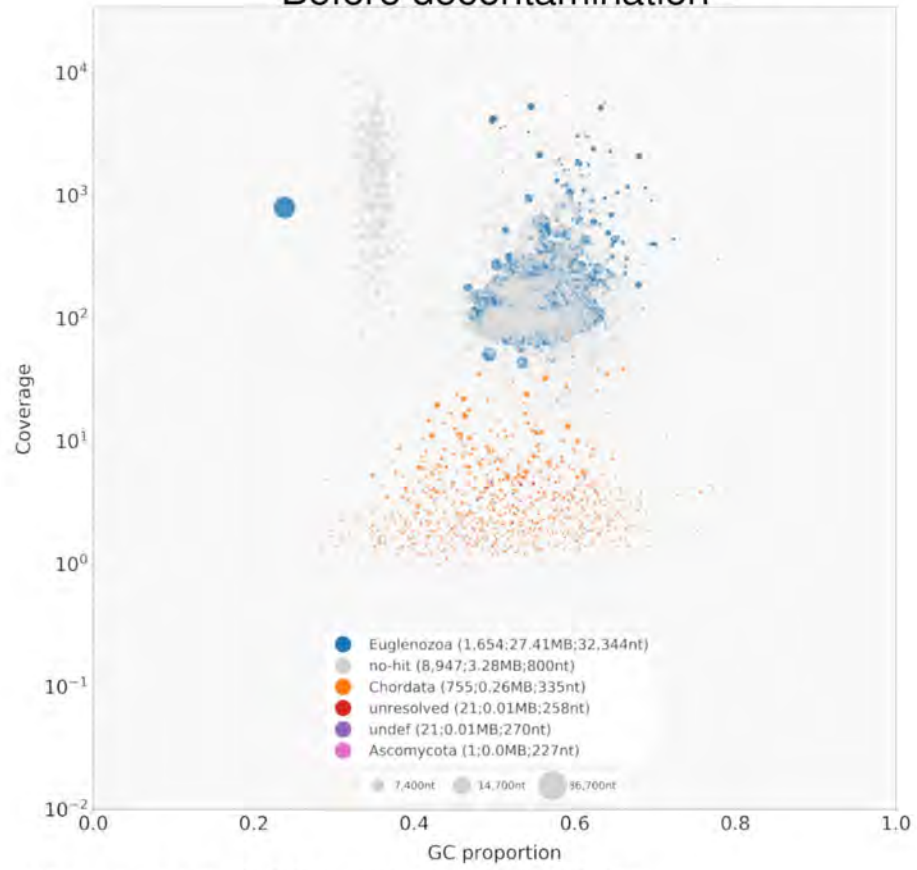

Unmapped: 0.69%; Mapped: 99.31%

After decontamination

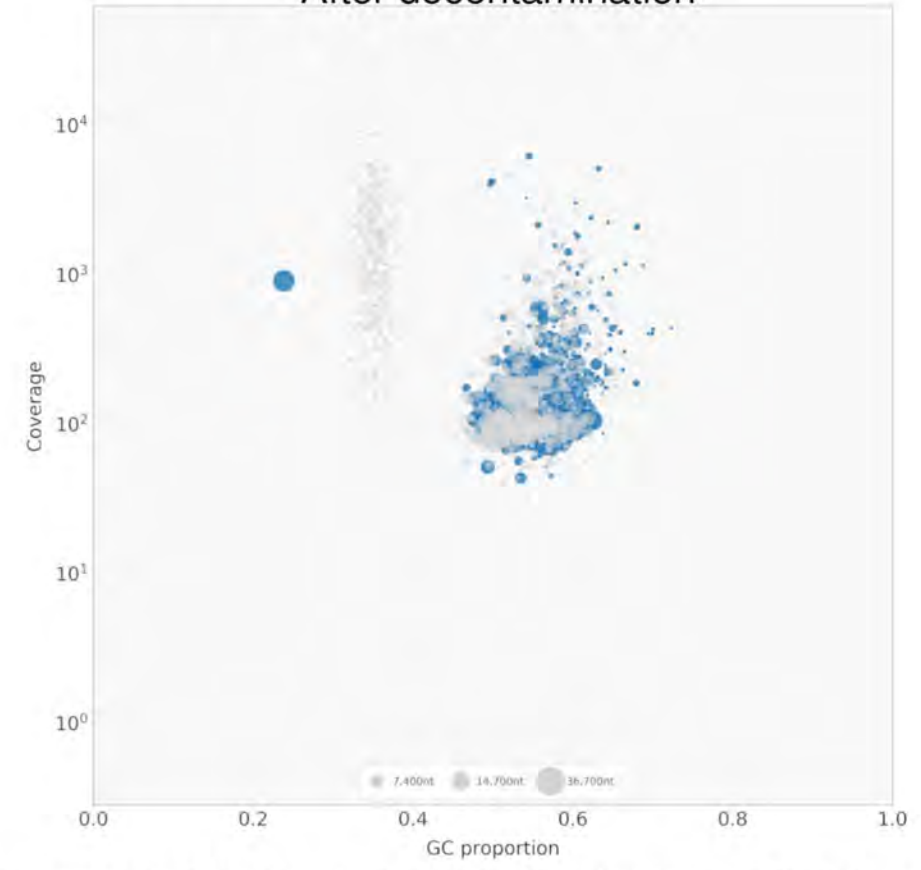

Unmapped: 0%; Mapped: 100% (Euglenozoa: 73.67%, no-hit: 26.33%,

# Porcisia hertigi TCC260

Before decontamination

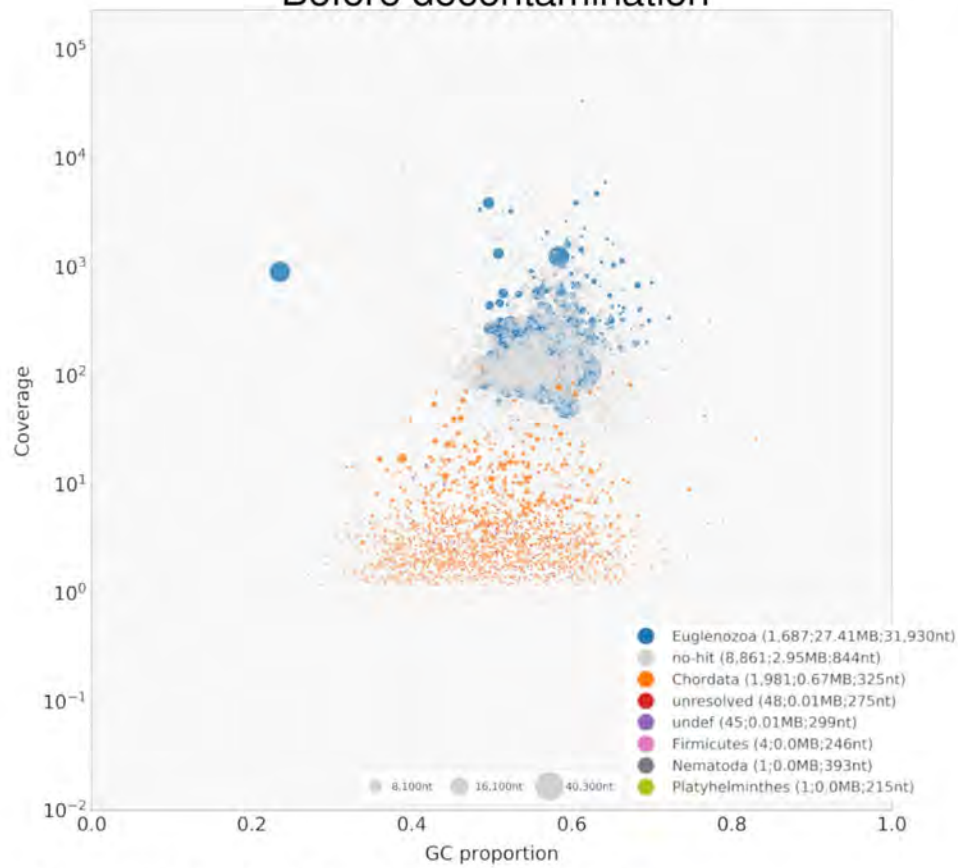

Unmapped: 2.53%; Mapped: 97.47%

After decontamination

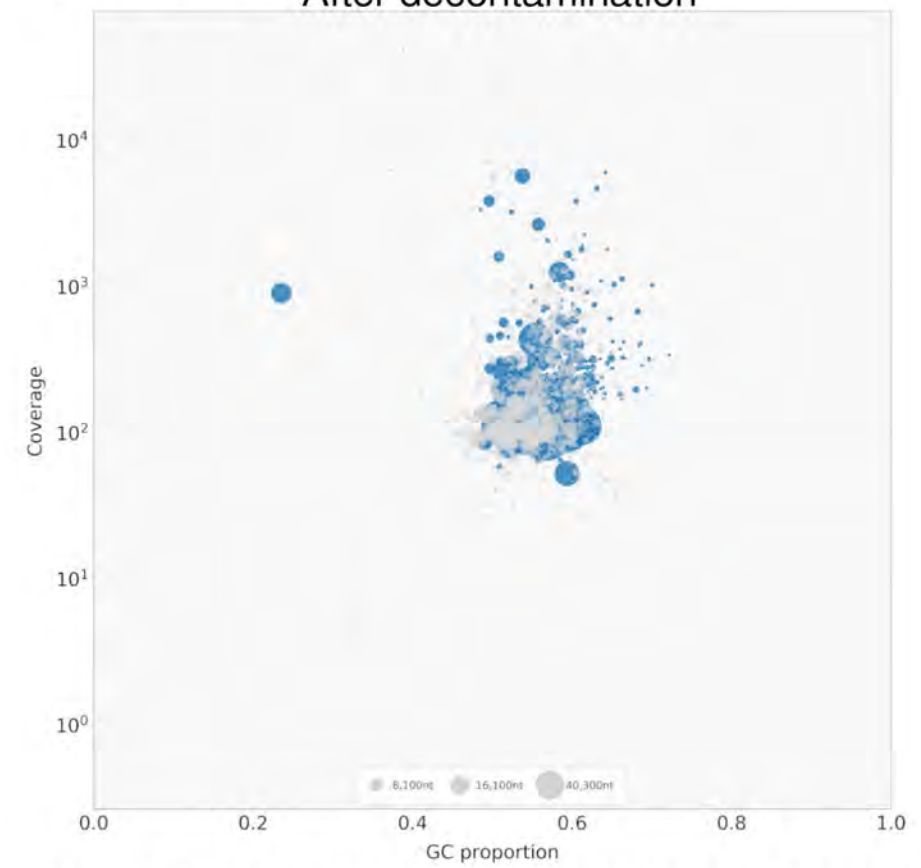

Unmapped: 0%; Mapped: 100% (Euglenozoa: 84.31%, no-hit: 15.69%
