# Supplementary material for: Genome Analysis of Endotrypanum and Porcisia spp., Closest Phylogenetic Relatives of Leishmania, Highlights the Role of Amastins in Shaping Pathogenicity
Source: MDPI journal article supplement (doi:10.3390/genes12030444), 2021-03-20

# Leishmania major

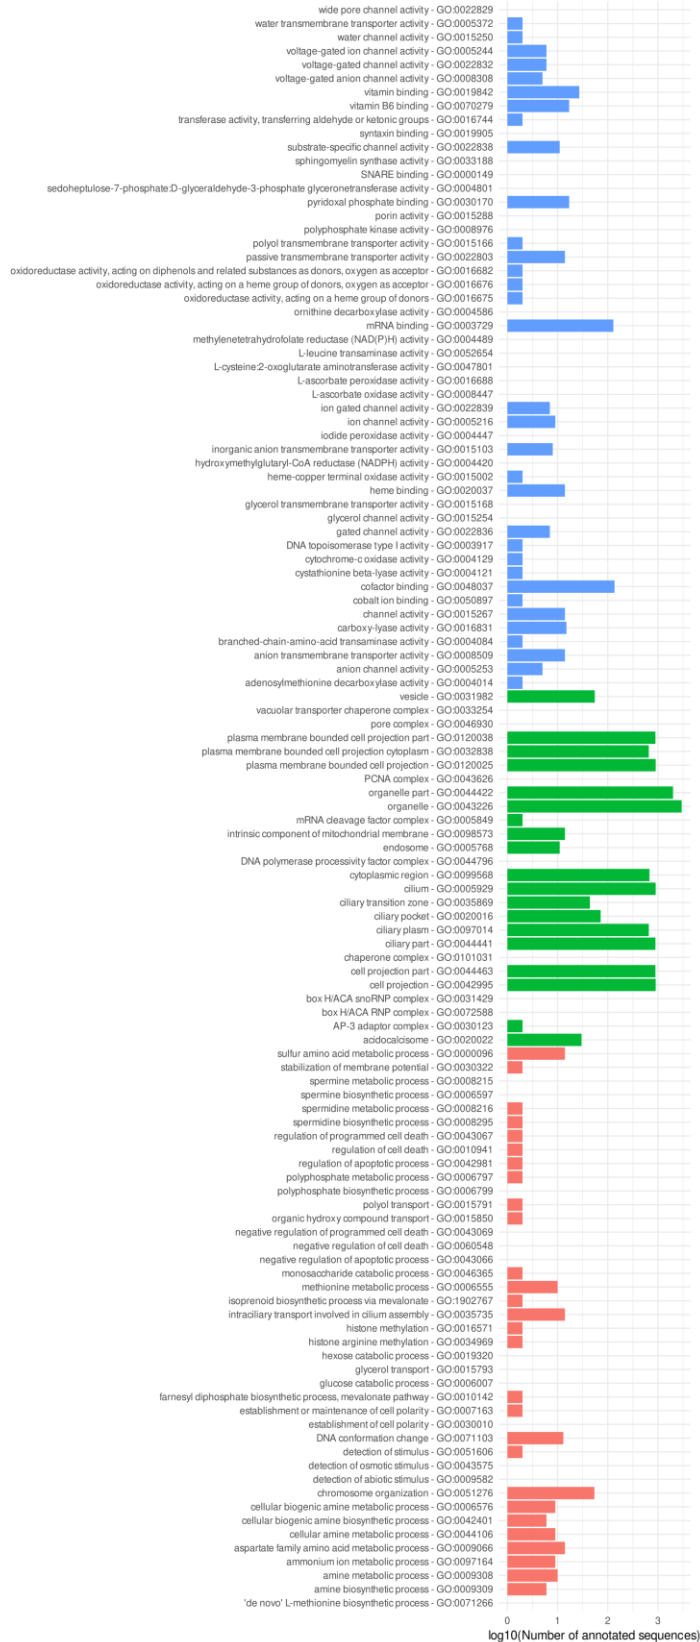

Biological process Cellular component Molecular function

# Endotrypanum-Porcisia

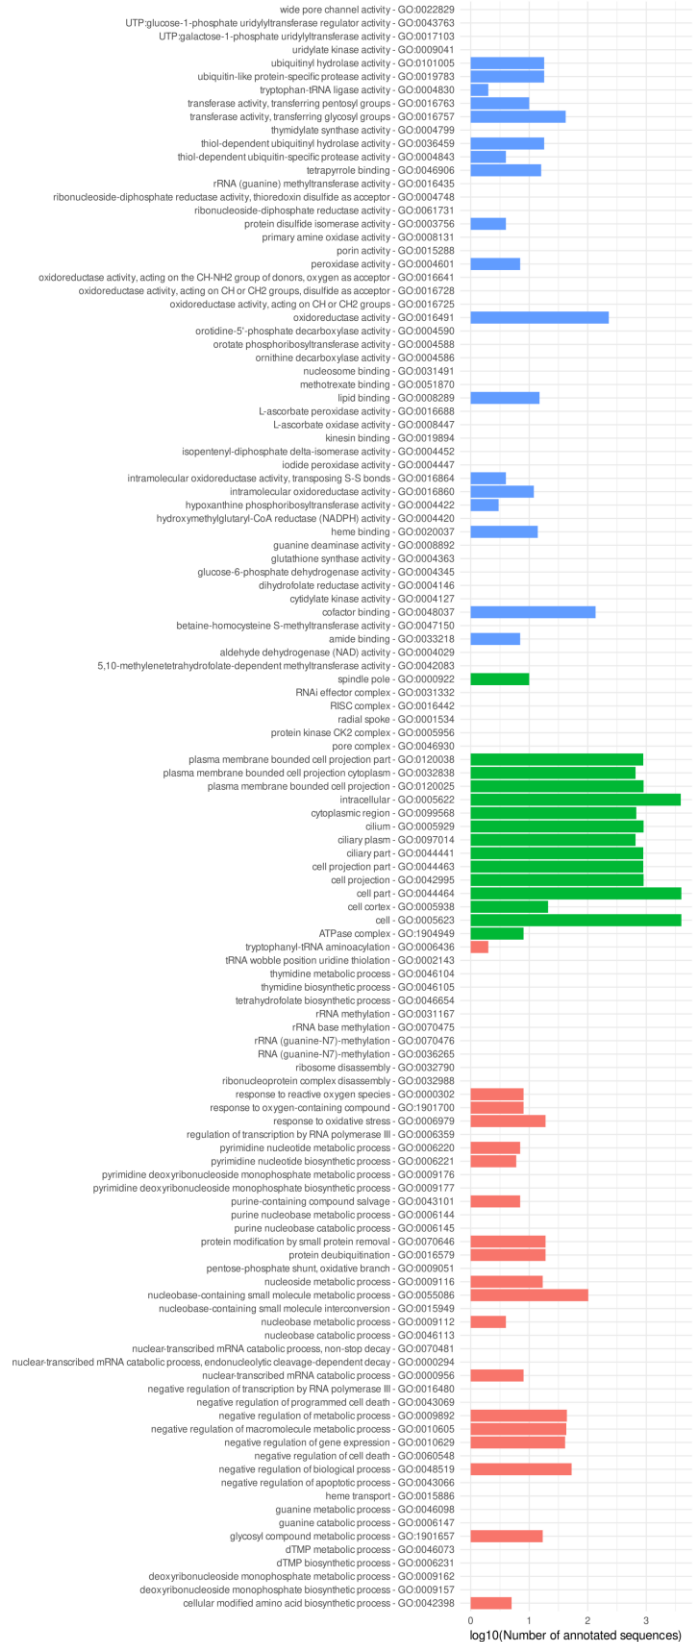

Supplement: s1 [file s1]
