# Supplementary material for: Genome Analysis of Endotrypanum and Porcisia spp., Closest Phylogenetic Relatives of Leishmania, Highlights the Role of Amastins in Shaping Pathogenicity
Source: MDPI journal article supplement (doi:10.3390/genes12030444), 2021-03-20
Supplement: s1 [file s1]

*E. monterogei* ATCC30507 (this study)*E. monterogei* ATCC30507 (this study)*E. monterogei* ATCC30507 (this study)

A

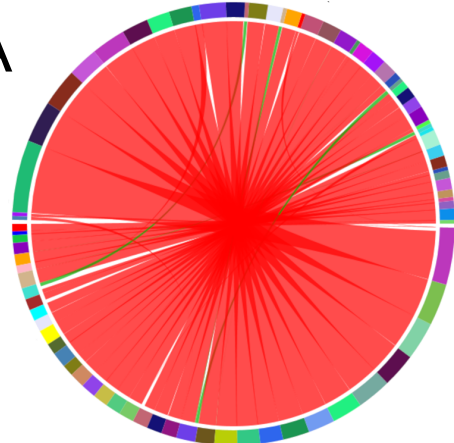*L. major* Friedlin (TriTrypDB)

B

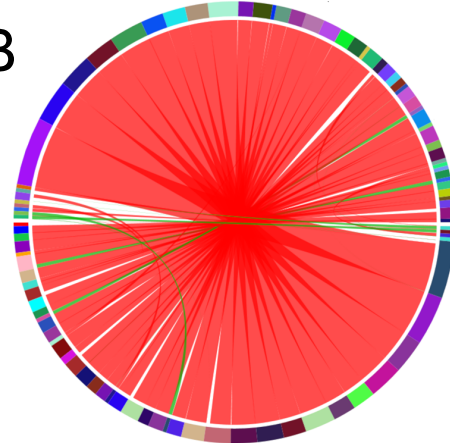*P. deanei* TCC258 (this study)

C

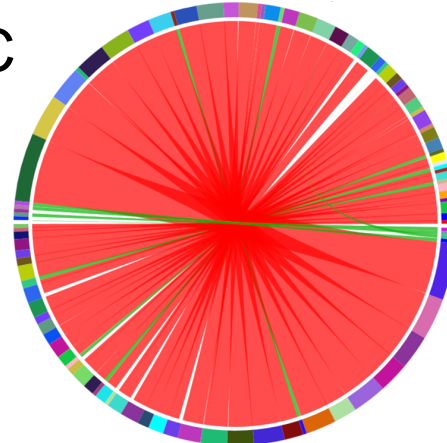*P. hertigi* TCC260 (this study)*P. deanei* TCC258 (this study)

D

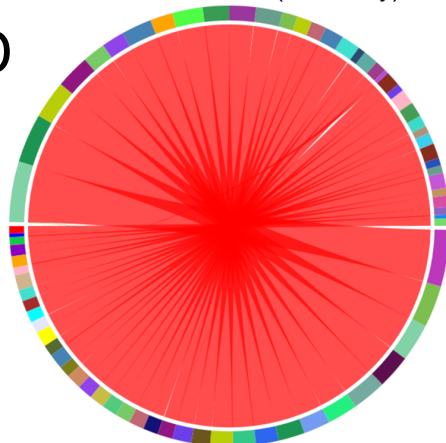*L. major* Friedlin (TriTrypDB)*P. deanei* TCC258 (this study)

E

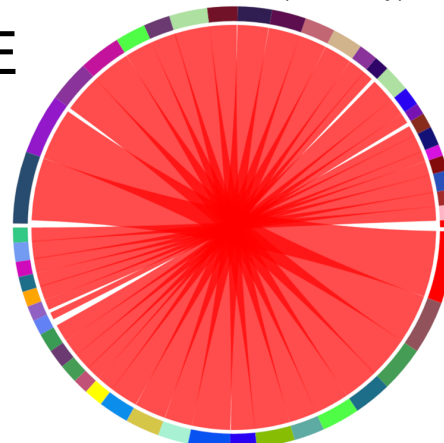*P. hertigi* TCC260 (this study)*P. hertigi* TCC260 (this study)

F

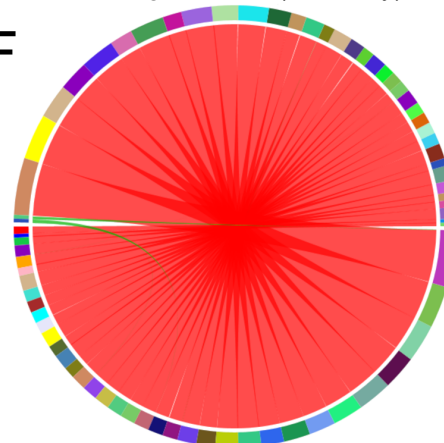*L. major* Friedlin (TriTrypDB)

|   | Species                                  | Chromosomes | Total kb | # genes | % of sequence covered by genes | # of anchors | % of anchors in blocks | % of anchors annotated | % of coverage by anchors | # of blocks | % double coverage | # of inverted blocks | % of genes within syntenic blocks |
|---|------------------------------------------|-------------|----------|---------|--------------------------------|--------------|------------------------|------------------------|--------------------------|-------------|-------------------|----------------------|-----------------------------------|
| A | <i>Endotrypanum monterogei</i> ATCC30507 | 35          | 30,584   | 7,695   | 46                             | 7,186        | 55                     | 94                     | 46                       | 155         | 0                 | 53                   | 82                                |
|   | <i>Leishmania major</i> Friedlin         | 36          | 32,855   | 10,354  | 50                             | 7,186        | 55                     | 97                     | 42                       | 155         | 0                 | 53                   | 50                                |
| B | <i>Endotrypanum monterogei</i> ATCC30507 | 35          | 30,584   | 7,695   | 46                             | 7,768        | 35                     | 92                     | 51                       | 113         | 0                 | 39                   | 56                                |
|   | <i>Porcisia deanei</i> TCC258            | 37          | 29,784   | 7,802   | 48                             | 7,768        | 35                     | 94                     | 52                       | 113         | 0                 | 39                   | 47                                |
| C | <i>Endotrypanum monterogei</i> ATCC30507 | 35          | 30,584   | 7,695   | 46                             | 7,761        | 34                     | 93                     | 51                       | 114         | 0                 | 37                   | 54                                |
|   | <i>Porcisia hertigi</i> TCC260           | 37          | 29,350   | 7,818   | 49                             | 7,761        | 34                     | 94                     | 53                       | 114         | 0                 | 37                   | 50                                |
| D | <i>Porcisia deanei</i> TCC258            | 37          | 29,784   | 7,802   | 48                             | 7,580        | 52                     | 96                     | 49                       | 68          | 0                 | 20                   | 84                                |
|   | <i>Leishmania major</i> Friedlin         | 36          | 32,855   | 10,354  | 50                             | 7,580        | 52                     | 97                     | 46                       | 68          | 0                 | 20                   | 41                                |
| E | <i>Porcisia deanei</i> TCC258            | 37          | 29,784   | 7,802   | 48                             | 8,425        | 55                     | 71                     | 72                       | 37          | 0                 | 0                    | 46                                |
|   | <i>Porcisia hertigi</i> TCC260           | 37          | 29,350   | 7,818   | 49                             | 8,425        | 55                     | 71                     | 73                       | 37          | 0                 | 0                    | 46                                |
| F | <i>Porcisia hertigi</i> TCC260           | 37          | 29,350   | 7,818   | 49                             | 7,565        | 52                     | 96                     | 50                       | 71          | 0                 | 16                   | 85                                |
|   | <i>Leishmania major</i> Friedlin         | 36          | 32,855   | 10,354  | 50                             | 7,565        | 52                     | 98                     | 46                       | 71          | 0                 | 16                   | 42                                |
